# Supplementary material for: Relationship between Psoriasis and Prevalence of Cardiovascular Disease in 88 Japanese Patients
Source: MDPI journal article supplement (doi:10.3390/jcm10163640), 2021-08-17
Supplement: s1 [file s1]

## Supplementary Materials

**Table S1.** Characteristics of patients with psoriasis at Kansai Medical University in detail.

| Case | Age | Sex | Type | PASI | BMI   | CCTA | Complications            | Additional Treatment | CRP   | BP      | FHP | FHC | Hyperlipidemia | Diabetes | Smoking | Drinking | ABI |
|------|-----|-----|------|------|-------|------|--------------------------|----------------------|-------|---------|-----|-----|----------------|----------|---------|----------|-----|
| 1    | 64  | F   | PsA  | 8    | 21.84 | -    | -                        | -                    | 0.133 | 104/69  | -   | +   | -              | -        | -       | +        | 2   |
| 2    | 44  | F   | PsA  | 13   | 27.55 | -    | Cerebral infarction      | -                    | 0.08  | 144/100 | -   | -   | +              | -        | +       | -        | -   |
| 3    | 72  | M   | EP   | 22   | 26.18 | +    | -                        | -                    | 0.025 | 106/75  | -   | -   | +              | +        | +       | +        | 4   |
| 4    | 46  | F   | PsA  | 12   | 28.52 | -    | -                        | -                    | 0.319 | 144/95  | -   | +   | +              | +        | +       | +        | -   |
| 5    | 56  | M   | PV   | 16   | 28.13 | -    | -                        | -                    | 0.073 | 127/96  | -   | -   | +              | -        | -       | +        | -   |
| 6    | 57  | M   | GPP  | 8.9  | 22.6  | -    | -                        | -                    | 0.077 | 137/87  | -   | +   | +              | -        | +       | +        | -   |
| 7    | 53  | M   | PV   | 21   | 21.89 | +    | -                        | medication           | 0.09  | 151/97  | -   | -   | -              | -        | -       | +        | -   |
| 8    | 81  | M   | PsA  | 11.2 | 24.61 | +    | Thoracic aortic aneurysm | madication           | 0.03  | 160/111 | -   | -   | -              | -        | -       | -        | -   |
| 9    | 60  | M   | PsA  | 7.1  | 21.97 | +    | -                        | madication           | 0.05  | 131/94  | -   | -   | -              | -        | -       | +        | -   |
| 10   | 64  | M   | PV   | 7.4  | 25.59 | -    | -                        | -                    | 0.041 | 134/85  | -   | -   | +              | -        | +       | +        | -   |
| 11   | 54  | F   | PV   | 5    | 28.04 | +    | -                        | -                    | 0.03  | 153/93  | -   | -   | -              | -        | -       | +        | -   |
| 12   | 48  | M   | PsA  | 10   | 22.79 | -    | -                        | -                    | 0.162 | 146/113 | -   | +   | -              | -        | -       | +        | -   |
| 13   | 49  | M   | PV   | 20   | 32.65 | -    | Liver cirrhosis          | -                    | 0.054 | 139/94  | -   | -   | -              | -        | -       | -        | -   |
| 14   | 72  | M   | PV   | 28   | 25.82 | +    | Colon polyp              | CABG                 | 0.045 | 162/80  | -   | -   | +              | +        | -       | -        | -   |
| 15   | 76  | M   | PsA  | 12.9 | 21.23 | +    | Thoracic aortic aneurysm | operation            | 0.041 | 156/105 | -   | +   | -              | +        | -       | -        | 4   |
| 16   | 67  | M   | PV   | 2.6  | 22.66 | -    | -                        | -                    | 0.846 | 137/97  | -   | -   | -              | -        | -       | -        | -   |
| 17   | 72  | F   | PV   | 9.6  | 27.34 | -    | -                        | -                    | 0.105 | 156/84  | -   | +   | -              | -        | -       | -        | -   |
| 18   | 42  | F   | PsA  | 16.2 | 21.91 | -    | -                        | -                    | 0.078 | 116/78  | -   | -   | -              | -        | -       | -        | -   |
| 19   | 71  | F   | PV   | 11.2 | 31.23 | -    | Angina                   | -                    | 2.567 | 142/86  | -   | -   | +              | +        | -       | -        | -   |
| 20   | 69  | M   | PV   | 29.3 | 23.03 | -    | -                        | -                    | 0.059 | 142/99  | -   | -   | +              | -        | +       | +        | -   |
| 21   | 79  | M   | PV   | 28   | 20.76 | +    | Tuberculosis             | SMPI                 | 0.315 | 154/103 | -   | -   | -              | -        | -       | +        | -   |
| **22 | 62  | M   | PsA  | 8    | 22.79 | +    | Cerebral hemorrhage      | PCI                  | 0.065 | 158/105 | -   | -   | +              | -        | +       | -        | 4   |
| 23   | 42  | M   | PV   | 33.9 | 37.18 | -    | -                        | -                    | 0.41  | 150/82  | -   | -   | +              | -        | -       | -        | -   |
| 24   | 41  | M   | PsA  | 6    | 21.8  | -    | -                        | -                    | 2.377 | 124/84  | -   | -   | -              | -        | -       | -        | 3   |
| 25   | 35  | M   | PV   | 35   | 30.29 | -    | -                        | -                    | 0.169 | 115/81  | +   | -   | +              | -        | +       | -        | -   |
| 26   | 76  | M   | PsA  | 10   | 20.76 | -    | -                        | -                    | 0.138 | 113/56  | -   | -   | +              | -        | -       | +        | 2   |
| 27   | 38  | M   | PsA  | 26.1 | 20.28 | +    | -                        | -                    | 0.04  | 133/90  | +   | -   | +              | -        | -       | -        | -   |

|    |    |   |     |      |       |   |                     |            |       |         |   |   |   |   |   |   |   |
|----|----|---|-----|------|-------|---|---------------------|------------|-------|---------|---|---|---|---|---|---|---|
| 28 | 55 | M | PsA | 15.5 | 25.51 | - | -                   | -          | 0.052 | 131/81  | - | - | - | + | - | - | - |
| 29 | 79 | M | GPP | 4    | 23.46 | + | -                   | -          | 0.05  | 140/80  | - | - | + | - | - | - | - |
| 10 | 65 | M | PV  | 10.6 | 24.22 | + | -                   | madication | 0.397 | 122/82  | - | - | - | - | - | + | - |
| 31 | 63 | M | PV  | 15.9 | 26.86 | - | -                   | -          | 0.184 | 139/67  | - | - | + | + | + | - | - |
| 32 | 33 | M | PV  | 22   | 26.86 | - | -                   | -          | 0.072 | 123/69  | - | - | + | - | + | - | - |
| 33 | 42 | M | PV  | 14   | 22.2  | - | -                   | -          | 1.678 | 120/78  | - | + | - | - | - | - | - |
| 34 | 83 | M | GPP | 30   | 28.2  | + | Cerebral hemorrhage | SMPI       | 7.216 | 109/64  | - | - | - | - | - | + | - |
| 35 | 41 | F | PV  | 8    | 19.92 | - | -                   | -          | 0.037 | 103/50  | - | + | - | - | - | - | - |
| 36 | 41 | M | PV  | 30   | 30.69 | - | -                   | -          | 0.221 | 129/70  | - | - | - | - | - | + | - |
| 37 | 71 | F | GPP | 36   | 22.2  | + | -                   | SMPI       | 0.075 | 167/95  | + | - | - | - | + | + | - |
| 38 | 56 | M | PsA | 4.5  | 29.07 | - | -                   | -          | 0.285 | 120/81  | - | + | - | - | - | - | - |
| 39 | 64 | M | PsA | 2.9  | 24.31 | + | -                   | madication | 0.015 | 147/102 | - | - | + | - | - | + | 4 |
| 40 | 37 | M | PV  | 6    | 25.35 | - | -                   | -          | 0.344 | 127/80  | - | - | - | - | + | - | 3 |
| 41 | 74 | F | PV  | 4    | 21.09 | - | -                   | -          | 0.158 | 132/83  | - | + | - | - | + | - | - |
| 42 | 57 | F | PsA | 6    | 19.72 | + | -                   | -          | 0.048 | 132/67  | - | - | + | + | + | + | 3 |
| 43 | 80 | F | PsA | 17.4 | 22.22 | + | Angina              | PCI        | 0.161 | 133/96  | - | - | + | - | - | - | - |
| 44 | 64 | M | PV  | 10   | 22.68 | - | -                   | -          | 0.037 | 115/76  | - | - | - | - | - | + | - |
| 45 | 67 | F | PsA | 3.1  | 21.37 | - | Malignant lymphoma  | -          | 0.028 | 136/88  | - | - | + | - | + | + | - |
| 46 | 45 | M | PV  | 21.4 | 21.19 | - | -                   | -          | 0.136 | 113/69  | - | - | - | - | + | - | - |
| 47 | 49 | M | PV  | 20   | 22.76 | - | -                   | -          | 0.053 | 120/70  | - | - | - | - | - | - | - |
| 48 | 51 | M | EP  | 18.5 | 18.87 | + | Lung cancer         | -          | 0.051 | 105/62  | - | - | + | - | + | + | - |
| 49 | 79 | M | PsA | 2    | 20.08 | + | -                   | SMPI       | 0.017 | 120/67  | - | - | - | - | + | + | 2 |
| 50 | 69 | F | PsA | 6    | 19.18 | + | -                   | SMPI       | 0.138 | 167/60  | - | - | + | + | - | - | 4 |
| 51 | 70 | F | PV  | 3    | 22.52 | - | -                   | -          | 0.036 | 158/86  | - | + | + | - | + | - | 2 |
| 52 | 70 | M | PsA | 4    | 23.21 | + | Myathenia gravis    | SMPI       | 0.06  | 177/91  | - | - | - | - | - | - | - |
| 53 | 70 | M | PsA | 9.6  | 27.36 | + | -                   | SMPI       | 0.197 | 177/104 | - | - | + | - | - | - | 4 |
| 54 | 48 | M | PsA | 2.8  | 22.22 | - | -                   | -          | 0.028 | 115/73  | - | + | - | - | + | + | 2 |
| 55 | 58 | M | EP  | 20   | 24.8  | + | -                   | madication | 0.034 | 138/98  | - | - | + | - | + | + | - |
| 56 | 54 | M | PV  | 5.3  | 25.39 | + | Heart failure       | PCI, CABG  | 0.341 | 117/42  | - | - | + | + | - | + | 5 |
| 57 | 54 | F | GPP | 10.3 | 23.23 | - | -                   | -          | 0.466 | 165/61  | - | - | + | - | - | + | 4 |
| 58 | 71 | M | PV  | 4.8  | 24.01 | - | -                   | -          | 0.053 | 139/82  | - | - | + | - | - | + | 4 |
| 59 | 47 | M | PV  | 13   | 26.89 | - | -                   | -          | 0.17  | 129/78  | - | - | + | - | + | + | - |
| 60 | 69 | M | PsA | 14.1 | 31.74 | + | -                   | -          | 0.587 | 130/73  | - | - | + | - | - | + | 1 |
| 61 | 56 | F | PV  | 3.9  | 27.77 | - | -                   | -          | 0.041 | 134/86  | - | - | + | - | - | - | 2 |

|       |    |   |     |      |       |   |                    |      |       |         |   |   |   |   |   |   |   |
|-------|----|---|-----|------|-------|---|--------------------|------|-------|---------|---|---|---|---|---|---|---|
| 62    | 68 | M | PsA | 5.4  | 29.18 | + | -                  | -    | 0.062 | 147/84  | - | - | + | - | + | - | 4 |
| 63    | 49 | F | PV  | 6    | 28.51 | - | -                  | -    | 0.328 | 129/79  | - | + | + | - | - | - | 4 |
| 64    | 65 | M | PV  | 10   | 26.89 | + | -                  | SMPI | 1.328 | 130/70  | - | - | + | - | + | - | 4 |
| 65    | 78 | F | PsA | 4    | 20    | + | -                  | SMPI | 1.095 | 124/73  | - | - | - | - | - | - | 3 |
| 66    | 36 | M | PsA | 4    | 30.12 | - | -                  | -    | 0.201 | 109/65  | - | - | - | - | - | - | 2 |
| 67    | 69 | M | PV  | 10   | 22.04 | - | Angina             | -    | 0.023 | 144/96  | - | - | - | - | - | - | 4 |
| 68    | 51 | M | PV  | 13.2 | 20.61 | - | -                  | -    | 0.193 | 117/79  | - | - | - | - | + | - | 4 |
| 69    | 39 | M | PsA | 4    | 31.71 | + | -                  | SMPI | 0.256 | 124/76  | - | - | - | - | + | + | 2 |
| 70    | 71 | F | PV  | 10   | 18.08 | - | -                  | -    | 0.032 | 147/72  | - | - | - | - | - | - | 2 |
| 71    | 38 | M | EP  | 53.4 | 43.28 | - | -                  | -    | 1.415 | 121/69  | - | - | + | - | - | - | 5 |
| 72    | 42 | M | PV  | 1.2  | 31.07 | - | -                  | -    | 0.654 | 155/103 | - | - | + | - | - | + | - |
| 73    | 68 | M | PV  | 10   | 23.8  | - | Pulmonary fibrosis | -    | 0.511 | 134/82  | - | - | + | + | - | + | - |
| 74    | 79 | M | PsA | 5.6  | 24.1  | + | Liver cancer       | -    | 0.347 | 154/79  | - | - | + | + | - | + | 4 |
| 75    | 56 | M | PV  | 5    | 26.35 | + | -                  | -    | 0.029 | 179/119 | - | - | + | - | + | + | 4 |
| 76    | 50 | F | PsA | 3.2  | 28.81 | + | Uterine cancer     | -    | 0.026 | 114/83  | - | - | - | + | - | - | 4 |
| 77    | 83 | M | PV  | 4    | 23.5  | - | Prostate cancer    | -    | 0.053 | 139/89  | - | - | - | + | - | - | 2 |
| 78    | 74 | F | PV  | 4.5  | 23.47 | + | -                  | -    | 0.041 | 136/86  | - | - | + | - | - | + | 4 |
| 79    | 65 | M | PV  | 4.9  | 25.22 | - | Schizophrenia      | -    | 0.235 | 132/83  | - | - | - | - | + | - | 2 |
| 80    | 55 | F | PV  | 12.2 | 28.37 | - | -                  | -    | 0.162 | 143/85  | - | - | - | - | + | - | 2 |
| 81    | 52 | F | PV  | 5.4  | 25.53 | - | Depression         | -    | 0.115 | 138/99  | - | - | + | - | - | - | 2 |
| 82    | 48 | M | PV  | 9.2  | 25.59 | + | -                  | -    | 0.118 | 150/83  | - | - | + | - | + | + | 4 |
| 83    | 82 | M | PV  | 4.8  | 31.83 | + | -                  | -    | 0.086 | 156/89  | - | - | - | - | + | + | 2 |
| 84    | 42 | F | PV  | 11.7 | 25.97 | - | -                  | -    | 0.066 | 112/61  | - | - | + | - | + | - | 2 |
| 85    | 63 | F | PsA | 5.4  | 17.58 | + | Renal failure      | SMPI | 0.491 | 129/61  | - | - | - | - | - | - | 4 |
| 86    | 68 | M | PsA | 2.4  | 24.03 | + | Pulmonary fibrosis | CABG | 0.113 | 131/79  | - | - | - | - | - | - | 4 |
| *87   | 57 | M | GPP | 40   | 29.57 | + | Angina             | PCI  | 0.098 | 145/95  | - | - | + | - | - | - | 3 |
| ***88 | 69 | M | PsA | 2    | 22.15 | + | -                  | -    | 0.103 | 133/93  | - | - | + | - | + | + | 2 |

+: positive data, -: negative data, \*: Case1, \*\*: Case2, \*\*\*: Case3, ABI: ankle-brachial pressure index: Supple (1), Normal (2), Slightly stiff (3), Hard (4), Clogged (5), BMI: body mass index, BP: blood pressure, CCTA: coronary artery and cardiac computed tomography, CRP: C-reactive protein, DBP: diastolic blood pressure, EP: erythrodermic psoriasis, FHC: familial history of cardiovascular disease, FHP: familial history of psoriasis, GPP: generalized pustular psoriasis, PASI: psoriasis area and severity index, PsA: psoriasis arthritis, PV: psoriasis vulgaris, SBP: systolic blood pressure, TG: triglycerides.

## Cases

### Figures S1–S3

A subset of cases in which CCTA was performed is described as supplementary data (Figures S1–S3).

#### Case 1:

A 57-year-old man had been diagnosed with PV 20 years earlier, and had been receiving topical treatment, but PV was gradually worsening. About 5 years before this presentation, joint pain developed in all four limbs. Although he started treatment with nonsteroidal anti-inflammatory drugs, pain continued to exacerbate. A few days prior to presentation, he experienced chest pain and treatment (Percutaneous Coronary Intervention) for acute myocardial infarction was initiated. Subsequently, the patient visited the dermatology department for treatment of the skin eruptions. At this visit, palpable erythema was observed over virtually the whole body, including the head and neck area, and multiple pustules were present on the plaques. Joint pain was also identified in all four limbs (Figure S1a, b). PASI score was 40, BMI was 29.57 kg/m<sup>2</sup>, and blood pressure was 145/95 mmHg, indicating hypertension. Blood test results were normal, except for triglycerides (TG), which were high at 218 mg/dl (normal range: 29–155 mg/dl). CCTA revealed catheter placement in the left coronary artery (Figure S1c).

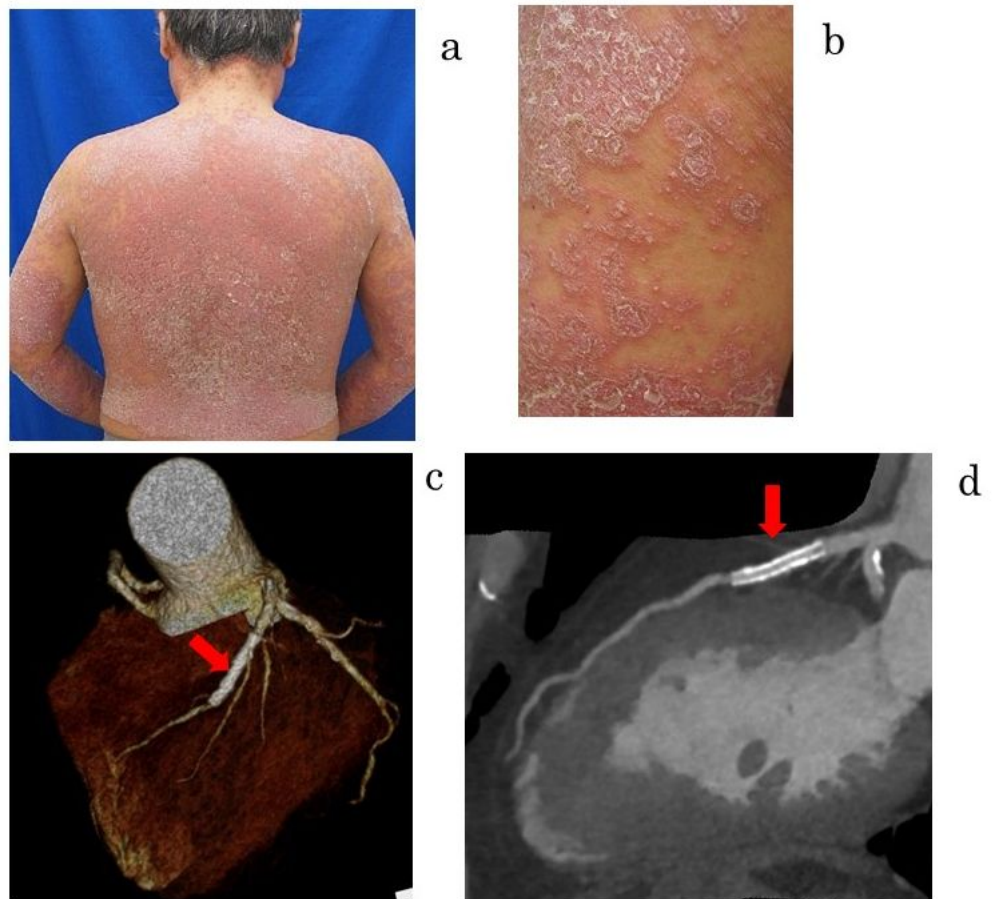

**Figure S1. Severe case of psoriasis, Figure S1a:** Almost the entire body surface displays irregular erythema, with pustules concentrated in areas of erythema. The patient has pain in the joints of all limbs, and PASI score is 40. **Figure S1b:** Magnification: pustules have formed and fused with scaly erythema. **Figure S1c, d:** c: CCTA, volume-rendering [VR] image; right: curved plane reconstruction [CPR] image). d: Stent placement (red arrow) is confirmed in the proximal part of the left anterior descending coronary artery. No stenosis is evident within the stent.

#### Case2:

A 62-year-old man without significant medical history had been diagnosed with PV 6–7 years earlier and was treated primarily with ultraviolet therapy, etretinate, and topical treatment by a local

physician. However, since skin eruptions had recently worsened, the patient visited our hospital and requested treatment with biologic agents.

On that visit, scaly erythema was observed on the head, back of the hands, and around the nail plates, and the nail plates were deformed (Figure S2a, b). Moreover, thick, scaly erythema was observed on the elbow and buttocks (Figure S1c, d). PASI score was 8, BMI was 22.79 kg/m<sup>2</sup>, and blood pressure was high, at 158/105 mmHg. Aside from mildly elevated TG (156 mg/dl; normal, 29–155 mg/dl), no abnormalities were observed on blood testing. MRI of the brain showed a hypertensive hemorrhage scar. Since CCTA revealed significant stenosis (90%) in the left descending and circumflex branches (Figure S2c), percutaneous catheter dilatation of the coronary artery was performed.

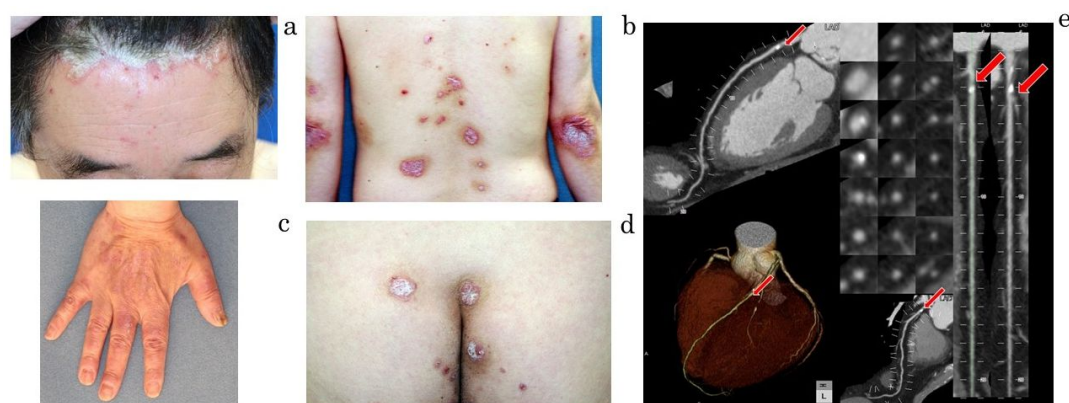

**Figure S2. Moderate case of psoriasis, Figure S2a–d:** Erythema with scales is apparent on the head (a), fingers and backs of the hands (b), backs of the elbows (c) and buttocks (d). The nail plates are deformed, and the patient has pain in the wrist and finger joints. PASI score is 8. **Figure S2e:** CCTA. Left: VR image; right: CPR image. Non-calcified plaque is attached to the proximal part of the left anterior descending coronary artery (red arrow) and its distal side. The non-calcified plaque is long in the long-axis direction, and myocardial ischemia caused by this plaque is suspected.

### Case3:

A 69-year-old man had developed skin eruptions that had not healed on the head and genital area 2–3 years earlier, but was monitoring his condition while using topical drugs prescribed by a local physician. Recently, he developed pain in his fingers, and visited the rheumatology department in our hospital. Psoriasis was suspected, and he subsequently visited the dermatology department. On that visit, scaly erythema was observed only on the head and genital areas, and psoriasis was identified from biopsy specimens (Figure 3a, b). PASI score was 2, BMI was 22.15 kg/m<sup>2</sup>, and results of blood tests and blood pressure were normal. CT of the heart revealed 80% stenosis of the 4th segment of the right coronary artery (Figure 3c). As a result, coronary artery bypass grafting was performed.

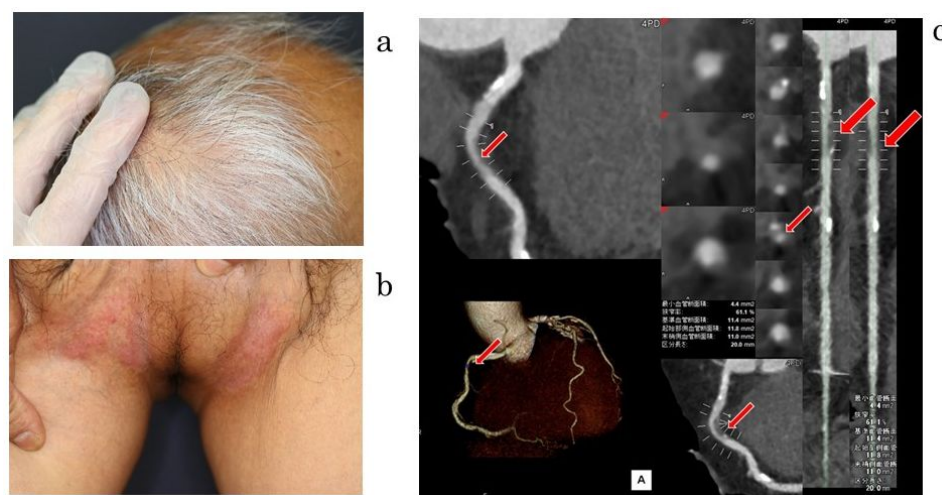

**Figure S3. Mild case of psoriasis, Figure S3a, b:** Erythema with scales is observed on the head (a) and both inguinal parts (b). Psoriasis was diagnosed by pathological examination of the inguinal

region. The patient had pain in both his fingers and his wrists. His PASI score was 2. **Figure S3c:** A non-calcified plaque (red arrow) was found proximal to the descending portion of the right coronary artery. The plaque is attached in the long axis direction and the CT value is low, suggesting that the plaque is fragile and unstable. BMI: body mass index, CCTA: coronary artery and cardiac computed tomography, CPR: curved plane reconstruction, PASI: psoriasis area and severity index, PV: psoriasis vulgaris, VR: volume-rendering.
